# Supplementary material for: Protective effect of orange essential oil on the formation of non-alcoholic fatty liver disease caused by high-fat diet
Source: Royal Society of Chemistry journal article supplement (doi:10.1039/d1fo03793e), 2021-12-10
Supplement: d1fo03793e1.pdf [file d1fo03793e1.pdf]

Table S1. Nutrient composition of ordinary feed and high-fat feed

| nutrient content | CD (%) | HFD (%) |
|------------------|--------|---------|
| fat              | 4.15   | 17      |
| protein          | 20.7   | 22.46   |
| fiber            | 2.31   | 2.68    |
| Cornstarch       | 50.00  | 10.00   |
| calcium          | 1.24   | 1.33    |
| phosphorus       | 0.83   | 0.88    |
